# Supplementary material for: Electrochemical Properties of LiFePO4 Cathodes: The Effect of Carbon Additives
Source: MDPI journal article supplement (doi:10.3390/batteries8090111), 2022-09-05
Supplement: s1 [file s1]

# Electrochemical properties of $\text{LiFePO}_4$ cathodes: the effect of carbon additives

Irina Stenina \*, Polina Minakova, Tatiana Kulova, Andrey Yaroslavtsev

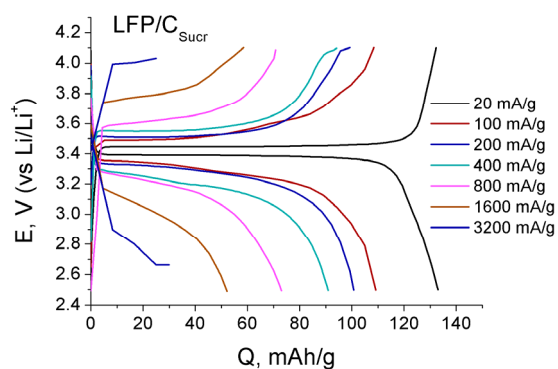

(a)

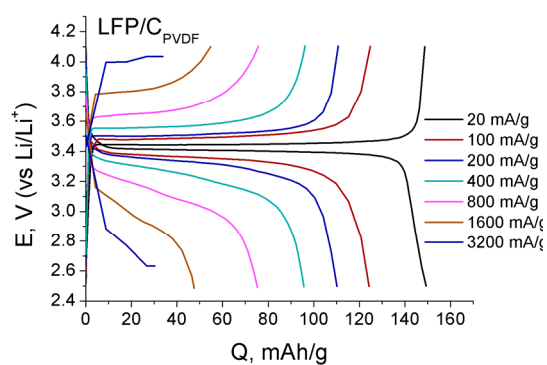

(b)

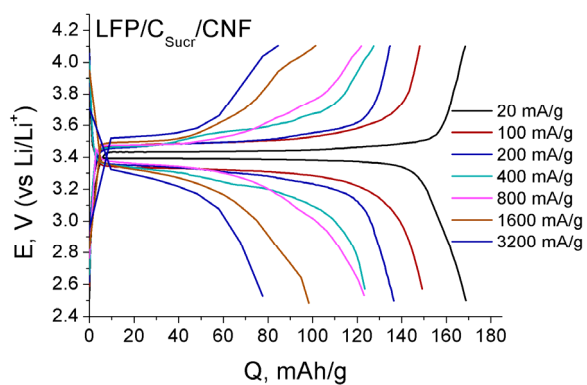

(c)

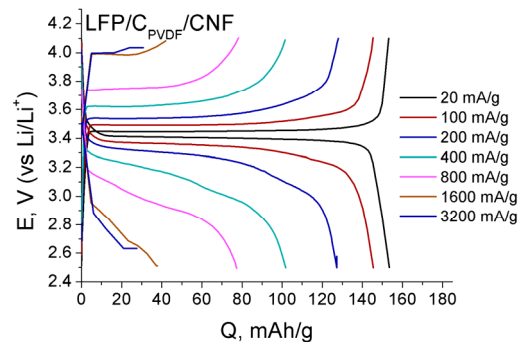

(d)

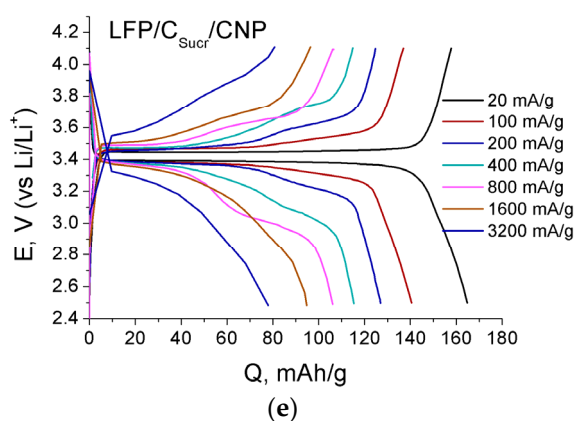

(e)

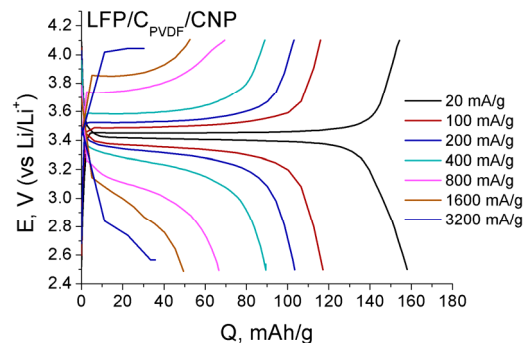

(f)

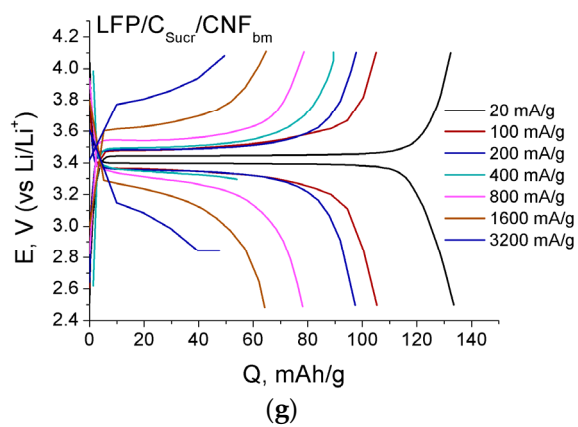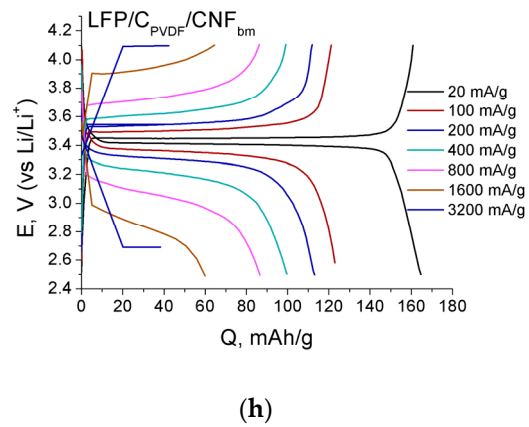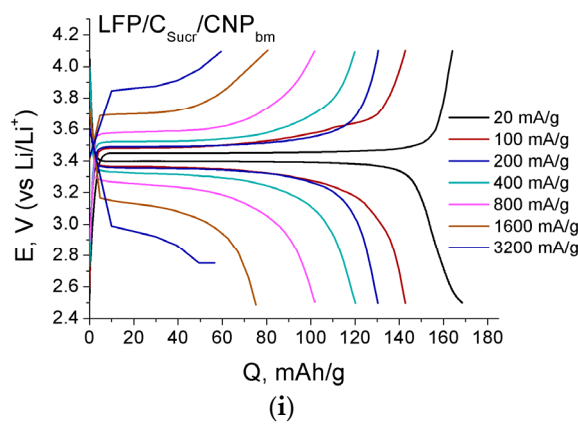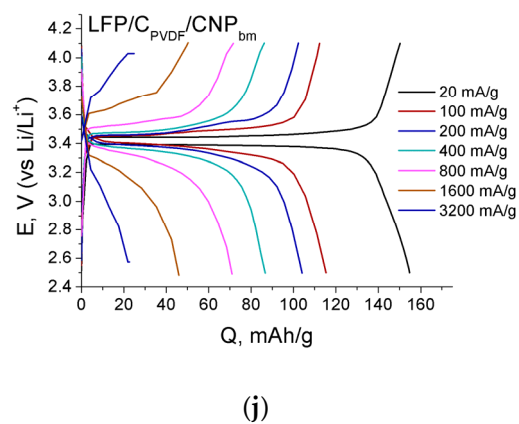

**Figure S1.** Charge/discharge profiles at different current densities for the LFP/C<sub>Sucr</sub> (a), LFP/C<sub>PVDF</sub> (b), LFP/C<sub>Sucr</sub>/CNF (c), LFP/C<sub>PVDF</sub>/CNF (d), LFP/C<sub>Sucr</sub>/CNP (e), LFP/C<sub>PVDF</sub>/CNP (f), LFP/C<sub>Sucr</sub>/CNF<sub>bm</sub> (g), LFP/C<sub>PVDF</sub>/CNF<sub>bm</sub> (h), LFP/C<sub>Sucr</sub>/CNP<sub>bm</sub> (i), LFP/C<sub>PVDF</sub>/CNP<sub>bm</sub> (j) samples.
